# Supplementary material for: ZC3HAV1 promotes the proliferation and metastasis via regulating KRAS in pancreatic cancer
Source: publisher site journal article supplement (doi:10.18632/aging.203296), 2021-07-28
Supplement: Supplementary file [file aging-v13i14-203296-supplementary-material-SD1.pdf]

## SUPPLEMENTARY FIGURE

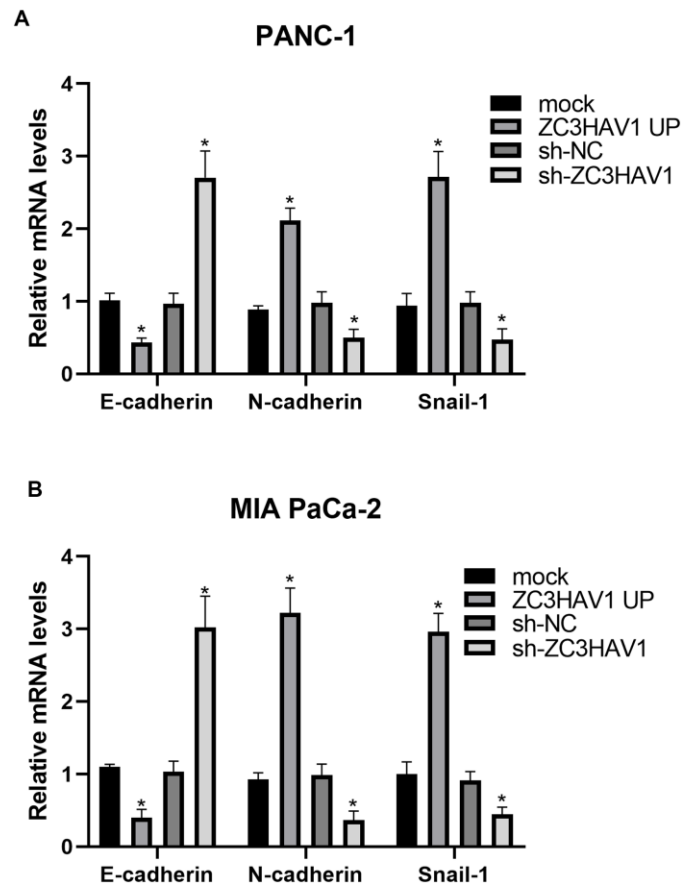

**Supplementary Figure 1. ZC3HAV1 promotes the mRNA expression of EMT-associated markers E-cadherin, N-cadherin, and Snail-1. (A) PANC-1 cell lines. (B) MIA PaCa-2 cell lines.**
